# Supplementary material for: Liquid–liquid extraction as a sample preparation procedure for the determination of Na, K, Ca, and Mg in biodiesel
Source: Royal Society of Chemistry journal article supplement (doi:10.1039/c7ay01482a), 2017-01-01
Supplement: c7ay01482a1.pdf [file c7ay01482a1.pdf]

### Electronic supplementary information

**Table S1.** Experimental matrix and responses obtained after execution of the experimental design to evaluate the best condition of extraction. n=3.

| Experiment | Variables           |                               |                             | Responses                                           |           |           |            |
|------------|---------------------|-------------------------------|-----------------------------|-----------------------------------------------------|-----------|-----------|------------|
|            | Temperature<br>(°C) | HNO <sub>3</sub><br>(1%; v:v) | Agitation<br>time<br>(min.) | Extracted concentration ± SD (mg kg <sup>-1</sup> ) |           |           |            |
|            |                     |                               |                             | FAAS                                                |           |           |            |
| Na         | K                   | Ca                            | Mg                          |                                                     |           |           |            |
| 1          | + (70 )             | + (With)                      | + (4)                       | 3.04±0.13                                           | 2.76±0.04 | 1.62±0.07 | 0.74±0.004 |
| 2          | + (70)              | + (With)                      | - (2)                       | 2.96±0.04                                           | 2.82±0.02 | 1.51±0.07 | 0.75±0.04  |
| 3          | + (70)              | - (Without)                   | + (4)                       | 3.06±0.08                                           | 2.91±0.08 | 1.45±0.07 | 0.74±0.05  |
| 4          | + (70)              | - (Without)                   | - (2)                       | 3.21±0.06                                           | 2.78±0.05 | 1.7±0.15  | 0.82±0.03  |
| 5          | - (25)              | + (With)                      | +(4)                        | 3.11±0.07                                           | 2.56±0.14 | 1.98±0.04 | 0.90±0.02  |
| 6          | - (25)              | + (With)                      | - (2)                       | 2.79±0.04                                           | 2.75±0.14 | 1.93±0.10 | 0.91±0.03  |
| 7          | - (25)              | - (Without)                   | + (4)                       | 2.89±0.05                                           | 2.9±0.05  | 1.91±0.01 | 0.90±0.02  |
| 8          | - (25)              | - (Without)                   | - (2)                       | 2.88±0.01                                           | 2.82±0.05 | 1.8±0.03  | 0.81±0.03  |

## Mathematical models

$Na^+$ :

$$R = 2.993 + 0.15_{temperature} + 0.065_{agitation\ time} - 0.035_{acid} - 0.1_{temperature \times acid} - 0.135_{agitation\ time \times acid}$$

$K^+$ :

$$R = 2.787 + 0.06_{temperature} - 0.01_{agitation\ time} - 0.13_{acid} - 0.045_{temperature \times acid} - 0.075_{agitation\ time \times acid}$$

$Ca^{2+}$ :

$$R = 1.757 - 0.335_{temperature} + 0.005_{agitation\ time} + 0.045_{acid} - 0.07_{temperature \times acid} + 0.075_{agitation\ time \times acid}$$

$Mg^{2+}$ :

$$R = 1.737 - 0.335_{temperature} + 0.005_{agitation\ time} + 0.045_{acid} - 0.07_{temperature \times acid} + 0.075_{agitation\ time \times acid}$$

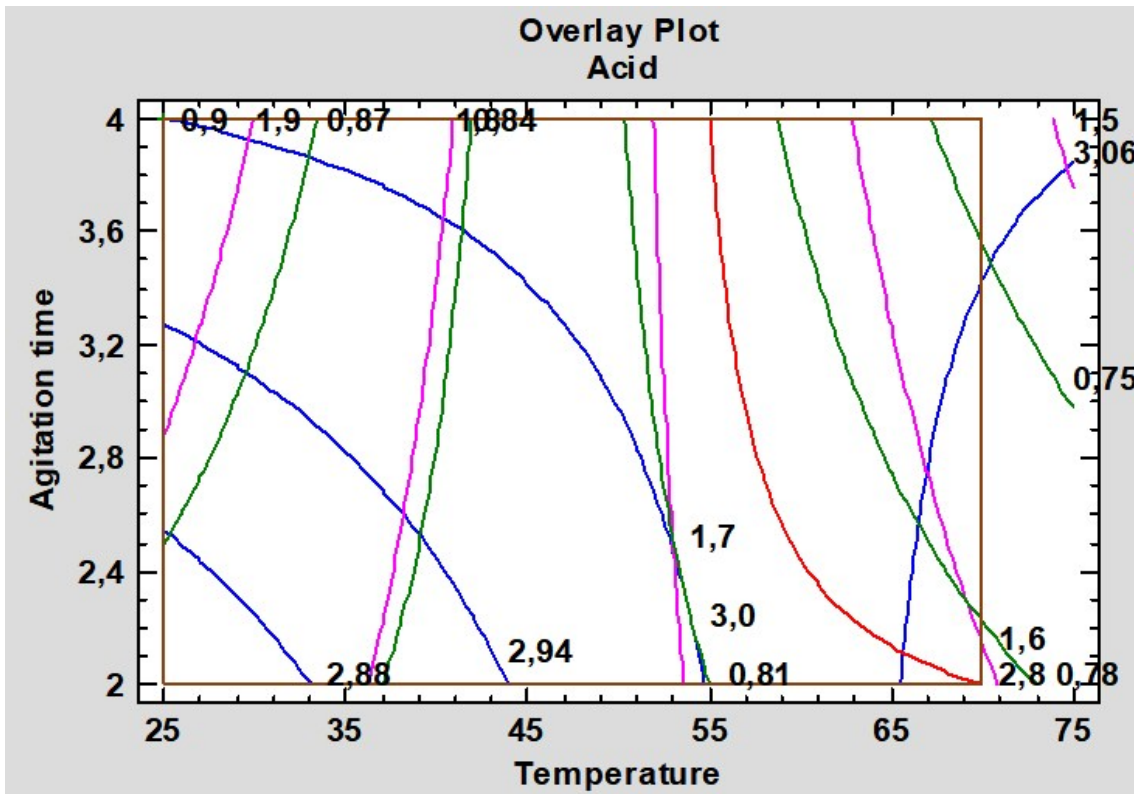

**Fig. S1.** Contour plot superimposed to Na (blue line), K (red line) Ca (pink line) and Mg (green line) obtained by Statgraphics Centurion XVI v. 16.1.15 software.
